# Supplementary material for: Favorable vaccine-induced SARS-CoV-2–specific T cell response profile in patients undergoing immune-modifying therapies
Source: PubMed Central journal article supplement (PMC9197512; doi:10.1172/jci159500), 2022-06-15
Supplement: jci-132-159500-s206.pdf [file jci-132-159500-s206.pdf]

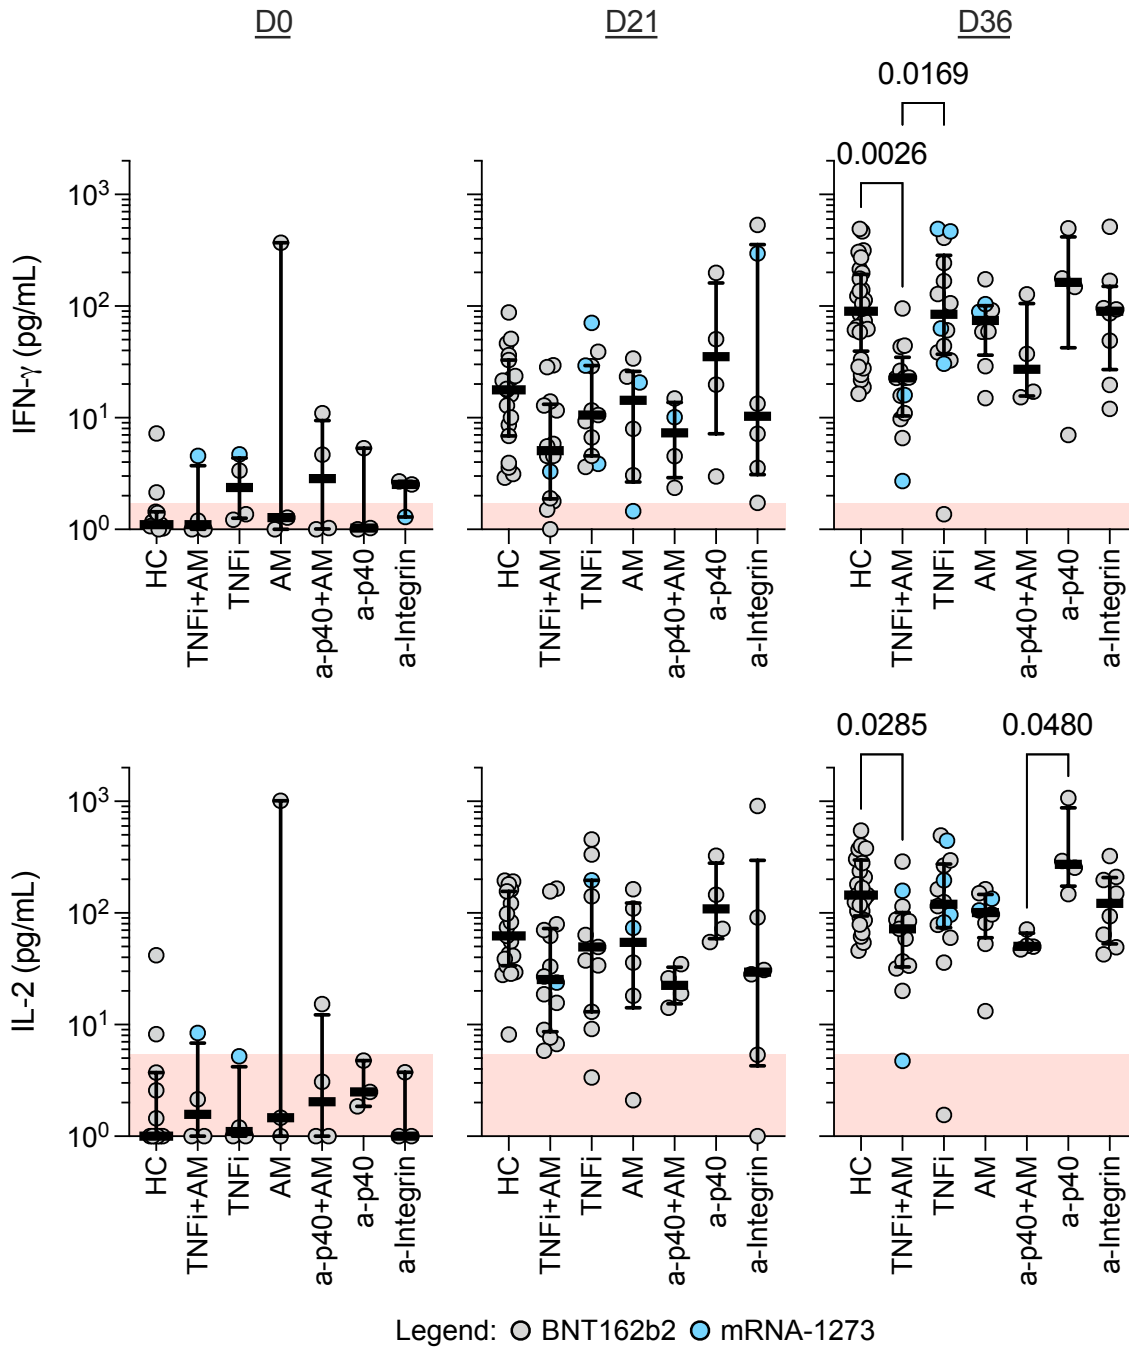

**Figure S1. Early T cell responses in patients under different immunotherapies.** (A) Dot plots with median line (middle bar) and interquartile range (whiskers) of quantified IFN- $\gamma$  or IL-2 concentrations (pg/mL) from S pool-stimulated whole blood supernatants of HC and IBD patients grouped by treatment and faceted according to timepoint. Shaded red region denotes the area under the threshold for a positive test. Statistical analyses were performed by Kruskal-Wallis and Dunn's test with p values shown above the comparison lines when significant ( $\alpha=0.05$ ). For D 0: HC (n=10), TNFi+AM (n=4), TNFi (n=4), AM (n=3), a-p40+AM (n=4), a-p40 (n=3), a-Integrin (n=3). For D 21: HC (n=19), TNFi+AM (n=14), TNFi (n=11), AM (n=6), a-p40+AM (n=4), a-p40 (n=4), a-Integrin (n=6). For D 36: HC (n=28), TNFi+AM (n=14), TNFi (n=14), AM (n=8), a-p40+AM (n=5), a-p40 (n=4), a-Integrin (n=8).

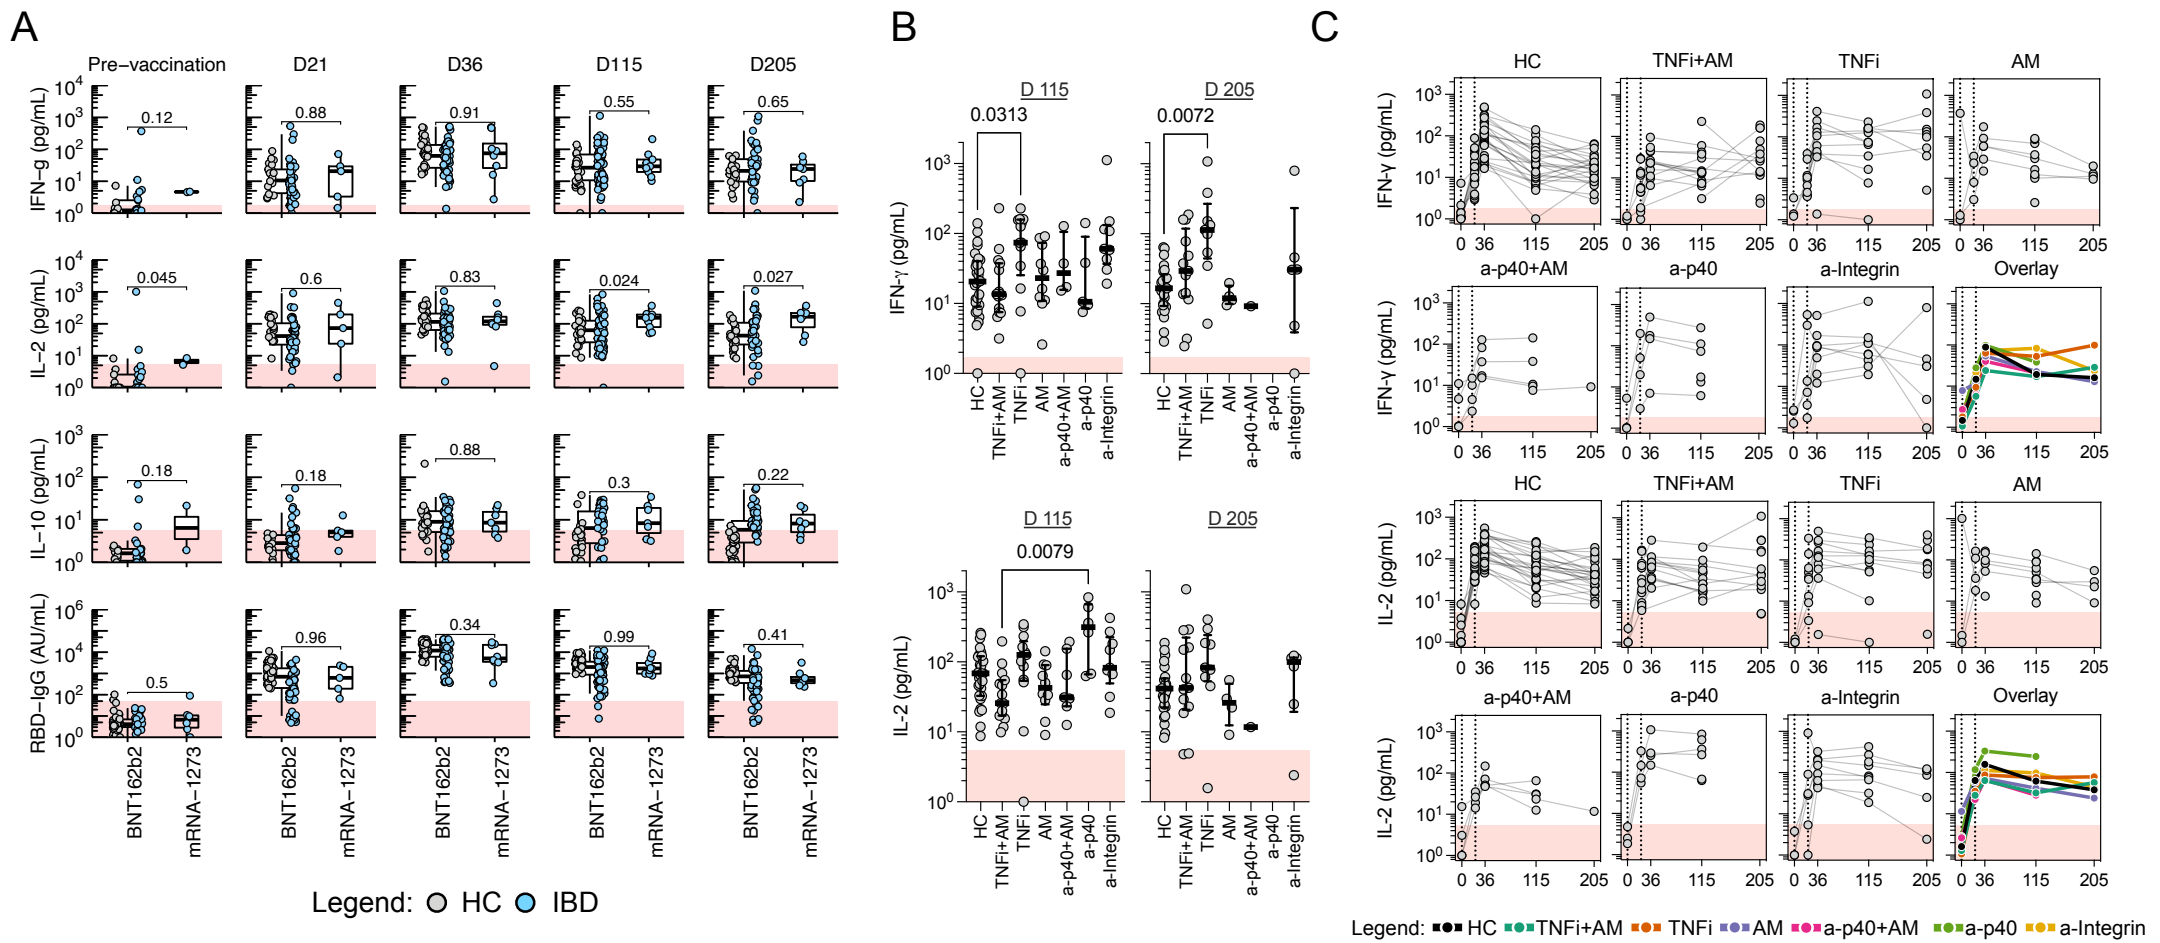

**Figure S2. Vaccine-induced T cell responses based on mRNA vaccine administered. (A)** Box and whisker plots with median line. Statistical analyses were performed by Wilcoxon signed rank test with p values indicated above the comparison line when significant ( $\alpha=0.05$ ). For RBD-IgG D0-D205: BNT162b2 (n=86, 91, 96, 110, 98), mRNA-1273 (n=6, 5, 8, 9, 8). For RBD-IgG D0-D205: BNT162b2 (n=86, 91, 96, 110, 98), mRNA-1273 (n=6, 5, 8, 9, 8). For IFN- $\gamma$ /IL-2 D0-D205: BNT162b2 (n=29, 59, 73, 87, 61), mRNA-1273 (n=2, 5, 8, 9, 7). For IL-10 D0-D205: BNT162b2 (n=29, 59, 72, 66, 58), mRNA-1273 (n=2, 5, 7, 7, 7). **(B)** Dot plots with median line (middle bar) and interquartile range (whiskers) of quantified IFN- $\gamma$  or IL-2 concentrations (pg/mL) from S pool-stimulated whole blood supernatants of HC and IBD patients without mRNA-1273 vaccinees grouped by treatment 3 and 6 months after completing their two-dose vaccination. Statistical analyses were performed by Kruskal-Wallis and Dunn's test with p values shown above the comparison lines when significant ( $\alpha=0.05$ ). For D 115: HC (n=29), TNFi+AM (n=15), TNFi (n=13), AM (n=10), a-p40+AM (n=5), a-p40 (n=6), a-Integrin (n=9). For D 205: HC (n=25), TNFi+AM (n=13), TNFi (n=9), AM (n=4), a-p40+AM (n=1), a-p40 (n=6), a-Integrin (n=9). **(C)** Quantified IFN- $\gamma$  or IL-2 concentrations (pg/mL) plotted against time of HC and IBD patients grouped by treatment without mRNA-1273 vaccinees. Datapoints originating from the same participant are connected by gray lines. Data is summarized in the 'Overlay' plot with lines connecting the geometric means of each group at each sampling interval. **(A-C)** Shaded red regions denote the area under the threshold for a positive test.

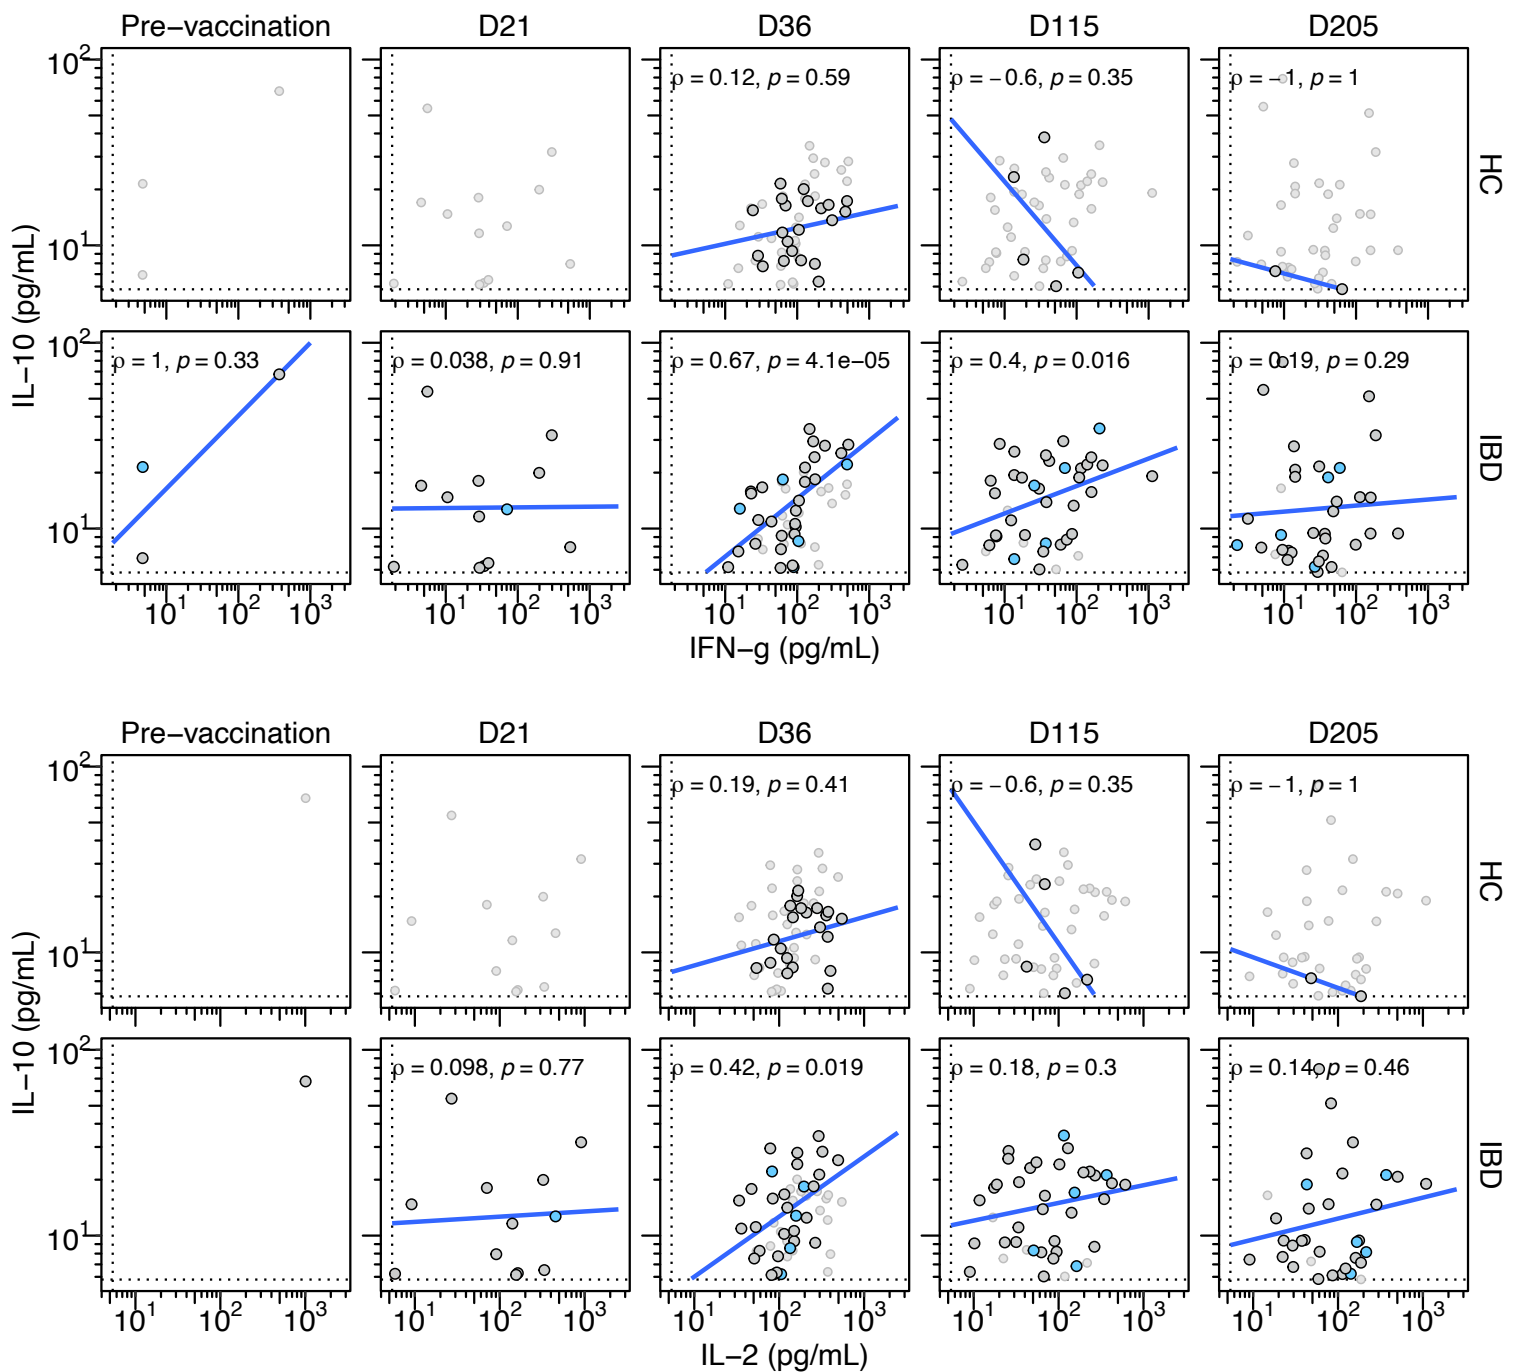

**Figure S3. 2-D Correlation plots between peptide-induced IFN- $\gamma$ /IL-2 and IL-10 from whole blood cytokine release assay between the HC and IBD cohorts.** Data from each donor are faceted by cohort (rows) and timepoint (columns). All points from the same timepoint are displayed in each plot, which points originating from the designated cohort (row titles) highlighted. Datapoints below the threshold defined for each analyte (broken horizontal and vertical lines) for a positive response have been excluded from the nonparametric Spearman correlation analysis. Spearman's rho ( $\rho$ ) and p values are inscribed into the plots when calculations are appropriate. Regression lines are drawn in blue (linear regression) used for visualisation purposes.

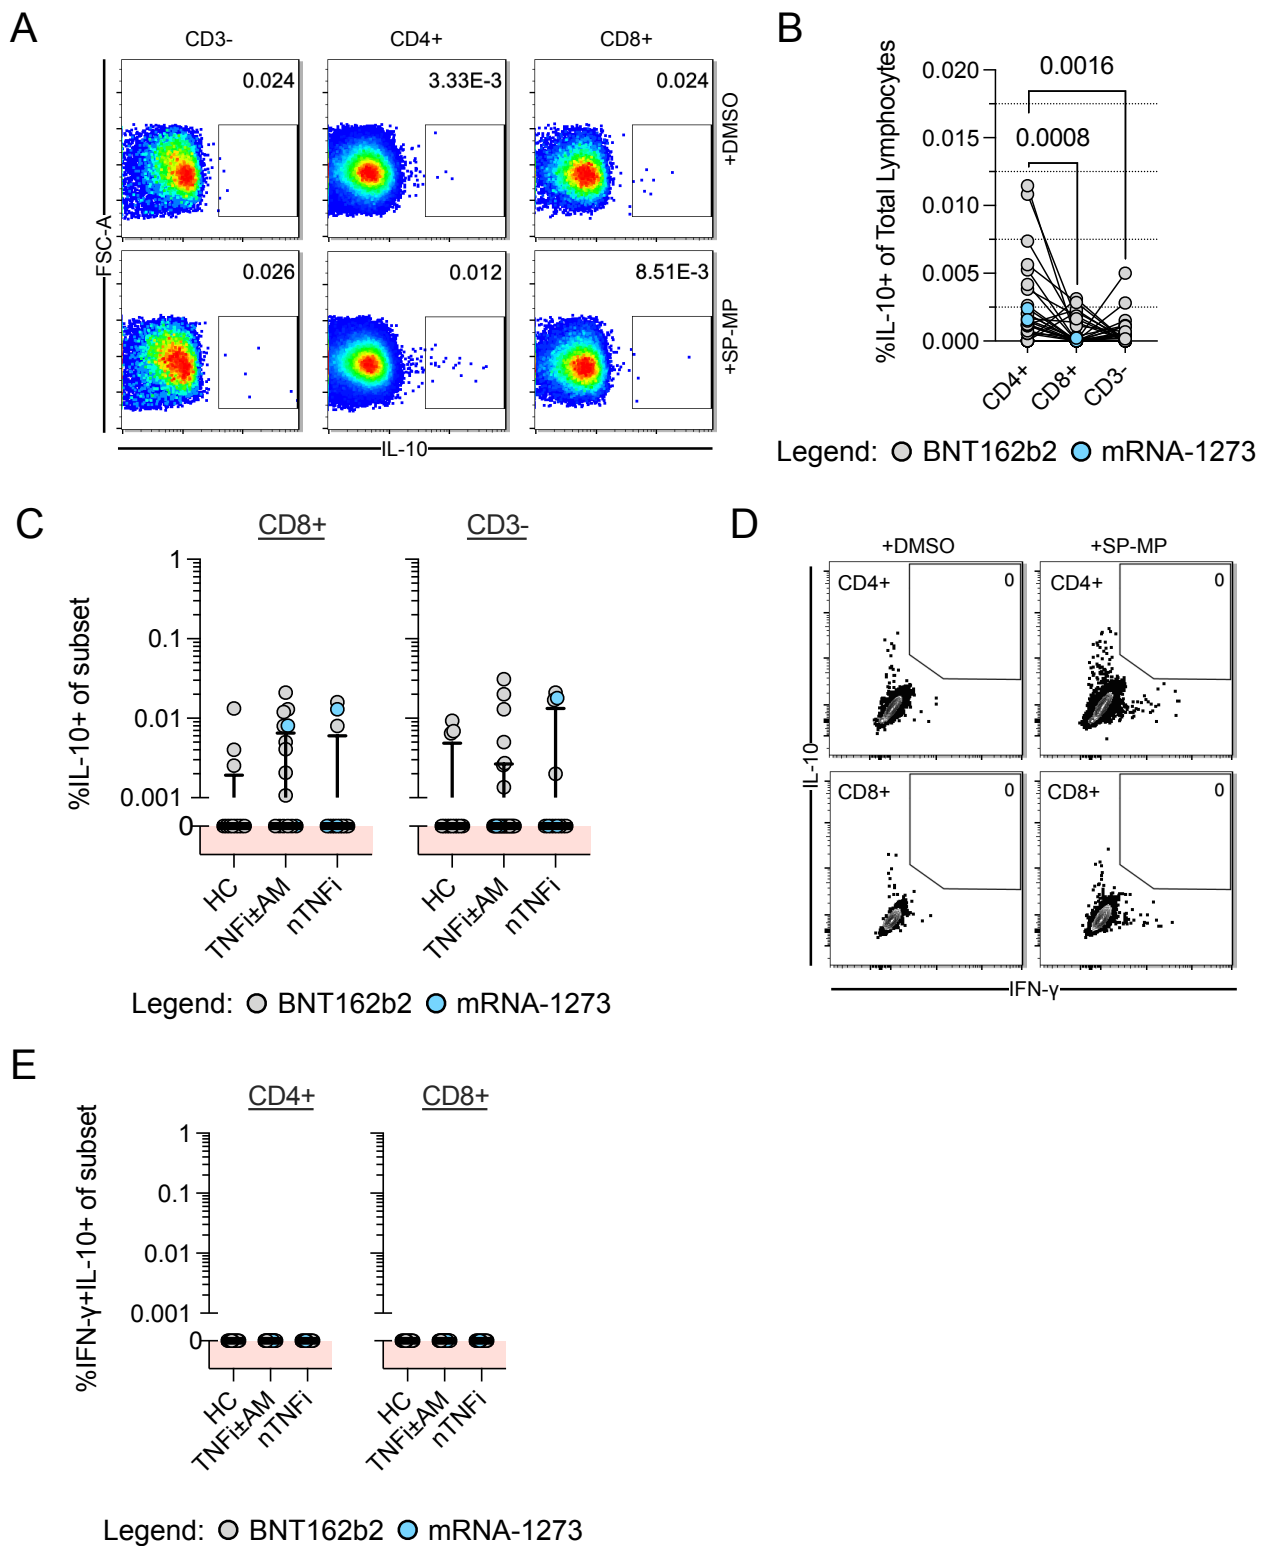

**Figure S4. IL-10 production in peripheral blood lymphocytes.** (A and D) Representative flow cytometry plots from intracellular cytokine staining to identify IL-10+ (A) or IFN- $\gamma$ + IL-10+ (D) T cell populations with or without stimulation with Spike peptides (drawn in gate). (B) Summary frequencies of paired background-subtracted IL-10+ frequencies identified from IBD patient PBMCs (n=30). Only samples with at least one subset of IL-10+ cells above background were included in the analysis. Statistical analysis was performed using multiple Wilcoxon matched-pairs signed rank test with p values indicated above the comparison line when significant ( $\alpha=0.05$ ). (C and E) Dot plots with median line (middle bar) and interquartile range (whiskers) of cellular frequencies of intracellular CD8+ or CD3- IL-10+ (C) and CD4+ or CD8+ IFN- $\gamma$ +IL-10+ (E) cells from HC (n=12) or IBD donors on TNFi $\pm$ AM (n=21) or nTNFi therapy (n=12). Statistical analyses were performed by Wilcoxon signed rank test with p values indicated above the comparison line when significant ( $\alpha=0.05$ ). Shaded red regions denote responses below background levels (denoted as 0).

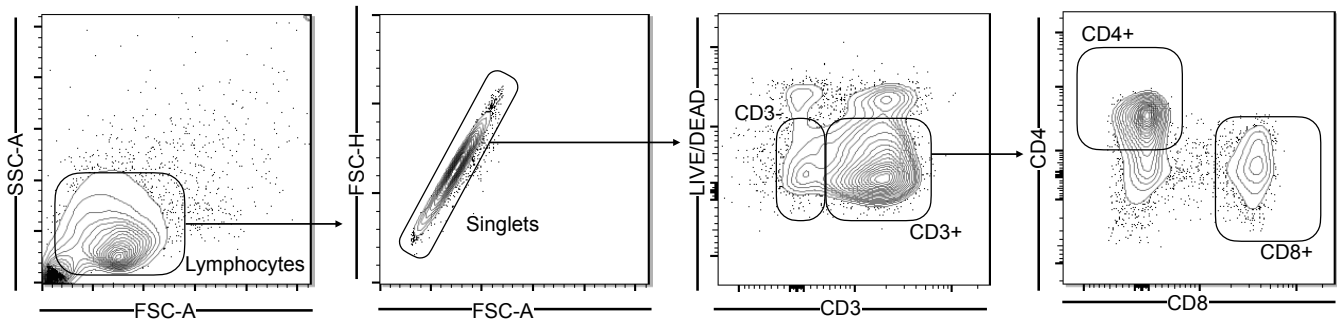

**Figure S5. Representative gating strategy of T cell subsets for activation-induced markers assay/intracellular cytokine staining.** Bivariate contour plots with outliers displaying a measured parameter obtained from flow cytometry indicated at the lower left corner of each plot. Gates are outlined in each plot. Similar gating strategies for T cell subsets are used for AIM and ICS assays.

Table S1. SARS-CoV-2 S pool peptide library

| Peptide # | Peptide Sequence | aa      |
|-----------|------------------|---------|
| 1         | IRGWIFGTTLDSTQ   | 101-115 |
| 2         | FGTTLDSTQSLIV    | 106-120 |
| 3         | CTFEYVSQPFLMDLE  | 166-180 |
| 4         | VSQPFLMDLEGKQGN  | 171-185 |
| 5         | TRFQTLALHRSYLT   | 236-250 |
| 6         | LLALHRSYLTSGDSS  | 241-255 |
| 7         | RSYLTSGDSSSGWTA  | 246-260 |
| 8         | CALDPLSETKCTLKS  | 291-305 |
| 9         | LSETKCTLKSFTVEK  | 296-310 |
| 10        | CTLKSFTVEKGIYQT  | 301-315 |
| 11        | FTVEKGIYQTSNFRV  | 306-320 |
| 12        | GIYQTSNFRVQPTES  | 311-325 |
| 13        | SASFSTFKCYGVSPT  | 371-385 |
| 14        | TFKCYGVSPTKLNDL  | 376-390 |
| 15        | YNYKLPDDFTGCVIA  | 421-435 |
| 16        | WNSNNLDSKVGGNYN  | 436-450 |
| 17        | LDSKVGGNYNLYRL   | 441-455 |
| 18        | GGNLYRLFRKSN     | 446-460 |
| 19        | YLYRLFRKSNLKPFE  | 451-465 |
| 20        | FRKSNLKPFERDIST  | 456-470 |
| 21        | LKPFERDISTEIYQA  | 461-475 |
| 22        | GPKKSTNLVKNKCVN  | 526-540 |
| 23        | TNLVKNKCVNFNFG   | 531-545 |
| 24        | FNFNGLTGTGVLTES  | 541-555 |
| 25        | LTGTGVLTESNKKFL  | 546-560 |
| 26        | RAGCLIGAEHVNNSY  | 646-660 |
| 27        | IGAEHVNNSYECDIP  | 651-665 |
| 28        | SVASQSIIAYTMSLG  | 686-700 |
| 29        | SIIAYTMSLGAENSV  | 691-705 |
| 30        | TMSLGAENSVAYSNN  | 696-710 |
| 31        | STECNNLLQYGSFC   | 746-760 |
| 32        | NNLLQYGSFCTQLNR  | 751-765 |
| 33        | KNTQEVFAQVKQIYK  | 776-790 |
| 34        | VFAQVKQIYKTPPIK  | 781-795 |

| <b>Peptide #</b> | <b>Peptide Sequence</b> | <b>aa</b> |
|------------------|-------------------------|-----------|
| 35               | KQIYKTPPIKDFGGF         | 786-800   |
| 36               | TPPIKDFGGFNFSQI         | 791-805   |
| 37               | NFSQILPDPSKPSKR         | 801-815   |
| 38               | AGFIKQYGDCLGDIA         | 831-845   |
| 39               | QYGDCLGDIAARDLI         | 836-850   |
| 40               | GAALQIPFAMQMAYR         | 891-905   |
| 41               | QMAYRFNGIGVTQNV         | 901-915   |
| 42               | FNGIGVTQNVLYENQ         | 906-920   |
| 43               | DSLSTASALGKLQD          | 936-950   |
| 44               | TASALGKLQDVVNQN         | 941-955   |
| 45               | AQALNTLVKQLSSNF         | 956-970   |
| 46               | VLNDILSRLDKVEAE         | 976-990   |
| 47               | LITGRLQSLQTYVTQ         | 996-1010  |
| 48               | QLIRAAEIRASANLA         | 1011-1025 |
| 49               | AEIRASANLAATKMS         | 1016-1030 |
| 50               | APHGVVFLHVTVPA          | 1056-1070 |
| 51               | HWFVTQRNFYEPQII         | 1101-1115 |
| 52               | KEIDRLNEVAKNLNE         | 1181-1195 |
| 53               | LNEVAKNLNESLIDL         | 1186-1200 |
| 54               | KNLNESLIDLQELGK         | 1191-1205 |
| 55               | IWLGFIAGLIAIVMV         | 1216-1230 |

Table S2: SARS-CoV-2 SP-MP pool peptide library

| Peptide # | Peptide Sequence | aa      |
|-----------|------------------|---------|
| 1         | MFVFLVLLPLVSSQC  | 1-15    |
| 2         | VLLPLVSSQCVNLTT  | 6-20    |
| 3         | VSSQCVNLTTTRTQLP | 11-25   |
| 4         | VNLTTTRTQLPPAYTN | 16-30   |
| 5         | RTQLPPAYTNSFTRG  | 21-35   |
| 6         | PAYTNSFTRGVYYPD  | 26-40   |
| 7         | SFTRGVYYPDKVFRS  | 31-45   |
| 8         | VYYPDKVFRSSVLHS  | 36-50   |
| 9         | KVFRSSVLHSTQDLF  | 41-55   |
| 10        | SVLHSTQDLFLPFFS  | 46-60   |
| 11        | TQDLFLPFFSNVTWF  | 51-65   |
| 12        | LPFFSNVTWFHAIHV  | 56-70   |
| 13        | NVTWFHAIHVSGTNG  | 61-75   |
| 14        | HAIHVSGTNGTKRFD  | 66-80   |
| 15        | SGTNGTKRFDNPVLP  | 71-85   |
| 16        | TKRFDNPVLPFNDGV  | 76-90   |
| 17        | NPVLPFNDGVYFAST  | 81-95   |
| 18        | FNDGVYFASTEKSNI  | 86-100  |
| 19        | YFASTEKSNIIRGWI  | 91-105  |
| 20        | EKSNIIRGWIFGTTL  | 96-110  |
| 21        | IRGWIFGTTLDSKTQ  | 101-115 |
| 22        | FGTTLDSKTQSLLIV  | 106-120 |
| 23        | DSKTQSLLIVNNATN  | 111-125 |
| 24        | SLLIVNNATNVVIKV  | 116-130 |
| 25        | NNATNVVIKVCEFQF  | 121-135 |
| 26        | VVIKVCEFQFCNDPF  | 126-140 |
| 27        | CEFQFCNDPFLGVYY  | 131-145 |
| 28        | CNDPFLGVYYHKNNK  | 136-150 |
| 29        | LGVYYHKNNKSWMES  | 141-155 |
| 30        | HKNNKSWMESEFRVY  | 146-160 |
| 31        | SWMESEFRVYSSANN  | 151-165 |
| 32        | EFRVYSSANNCTFEY  | 156-170 |
| 33        | SSANNCTFEYVSQPF  | 161-175 |
| 34        | CTFEYVSQPFLMDLE  | 166-180 |



| Peptide # | Peptide Sequence | aa      |
|-----------|------------------|---------|
| 35        | VSQPFLMDLEGKQGN  | 171-185 |
| 36        | LMDLEGKQGNFKNLR  | 176-190 |
| 37        | GKQGNFKNLREFVFK  | 181-195 |
| 38        | FKNLREFVFKNIDGY  | 186-200 |
| 39        | EFVFKNIDGYFKIYS  | 191-205 |
| 40        | NIDGYFKIYSKHTPI  | 196-210 |
| 41        | FKIYSKHTPINLVRD  | 201-215 |
| 42        | KHTPINLVRDLPQGF  | 206-220 |
| 43        | NLVRDLPQGFSALEP  | 211-225 |
| 44        | LPQGFSALEPLVDLP  | 216-230 |
| 45        | SALEPLVDLPIGINI  | 221-235 |
| 46        | LVDLPIGINITRFQT  | 226-240 |
| 47        | IGINITRFQTLALH   | 231-245 |
| 48        | TRFQTLALHRSYLT   | 236-250 |
| 49        | LLALHRSYLTPGDSS  | 241-255 |
| 50        | RSYLTPGDSSSGWTA  | 246-260 |
| 51        | PGDSSSGWTAGAAAY  | 251-265 |
| 52        | SGWTAGAAAYVGYL   | 256-270 |
| 53        | GAAAYVGYLQPRTF   | 261-275 |
| 54        | YVGYLQPRTFLLKYN  | 266-280 |
| 55        | QPRTFLLKYNENGTI  | 271-285 |
| 56        | LLKYNENGTITDAVD  | 276-290 |
| 57        | ENGTITDAVDCALDP  | 281-295 |
| 58        | TDAVDCALDPLSETK  | 286-300 |
| 59        | CALDPLSETKCTLKS  | 291-305 |
| 60        | LSETKCTLKSFTVEK  | 296-310 |
| 61        | CTLKSFTVEKGIYQT  | 301-315 |
| 62        | FTVEKGIYQTSNFRV  | 306-320 |
| 63        | GIYQTSNFRVQPTES  | 311-325 |
| 64        | SNFRVQPTESIVRFP  | 316-330 |
| 65        | QPTESIVRFPNITNL  | 321-335 |
| 66        | IVRFPNITNLCPFGE  | 326-340 |
| 67        | NITNLCPFGEVFNAT  | 331-345 |
| 68        | CPFGEVFNATRFASV  | 336-350 |
| 69        | VFNATRFASVYAWNR  | 341-355 |

| Peptide # | Peptide Sequence | aa      |
|-----------|------------------|---------|
| 70        | RFASVYAWNRKRISN  | 346-360 |
| 71        | YAWNRKRISNCVADY  | 351-365 |
| 72        | KRISNCVADYSVLYN  | 356-370 |
| 73        | CVADYSVLYNSASFS  | 361-375 |
| 74        | SVLYNSASFSTFKCY  | 366-380 |
| 75        | SASFSTFKCYGVSPT  | 371-385 |
| 76        | TFKCYGVSPTKLNDL  | 376-390 |
| 77        | GVSPTKLNDLCFTNV  | 381-395 |
| 78        | KLNDLCFTNVYADSF  | 386-400 |
| 79        | CFTNVYADSFVIRGD  | 391-405 |
| 80        | YADSFVIRGDEV RQI | 396-410 |
| 81        | VIRGDEV RQIAPGQT | 401-415 |
| 82        | EV RQIAPGQTGKIAD | 406-420 |
| 83        | APGQTGKIADYNYKL  | 411-425 |
| 84        | GKIADYNYKL PDDFT | 416-430 |
| 85        | YNYKL PDDFTGCVIA | 421-435 |
| 86        | PDDFTGCVIAWNSNN  | 426-440 |
| 87        | GCVIAWNSNNLDSKV  | 431-445 |
| 88        | WNSNNLDSKVGGNYN  | 436-450 |
| 89        | LDSKVGGNYNYLYRL  | 441-455 |
| 90        | GGNYNYLYRLFRKSN  | 446-460 |
| 91        | YLYRLFRKSNLKPFE  | 451-465 |
| 92        | FRKSNLKPFERDIST  | 456-470 |
| 93        | LKPFERDISTEIYQA  | 461-475 |
| 94        | RDISTEIYQAGSTPC  | 466-480 |
| 95        | EIYQAGSTPCNGVEG  | 471-485 |
| 96        | GSTPCNGVEGFNCYF  | 476-490 |
| 97        | NGVEGFNCYFPLQSY  | 481-495 |
| 98        | FNCYFPLQSYGFQPT  | 486-500 |
| 99        | PLQSYGFQPTNGVGY  | 491-505 |
| 100       | GFQPTNGVGYQP YRV | 496-510 |
| 101       | NGVGYQP YRVVLSF  | 501-515 |
| 102       | QP YRVVLSFELLHA  | 506-520 |
| 103       | VVLSFELLHAPATVC  | 511-525 |

| Peptide # | Peptide Sequence | aa      |
|-----------|------------------|---------|
| 104       | ELLHAPATVCGPKKS  | 516-530 |
| 105       | PATVCGPKKSTNLVK  | 521-535 |
| 106       | GPKKSTNLVKNKCVN  | 526-540 |
| 107       | TNLVKNKCVNFNFNFG | 531-545 |
| 108       | NKCVNFNFNGLTGTG  | 536-550 |
| 109       | FNFNGLTGTGVLTES  | 541-555 |
| 110       | LTGTGVLTESNKKFL  | 546-560 |
| 111       | VLTESNKKFLPFQQF  | 551-565 |
| 112       | NKKFLPFQQFGRDIA  | 556-570 |
| 113       | PFQQFGRDIADTTDA  | 561-575 |
| 114       | GRDIADTTDAVRDPQ  | 566-580 |
| 115       | DTTDAVRDPQTLEIL  | 571-585 |
| 116       | VRDPQTLEILDITPC  | 576-590 |
| 117       | TLEILDITPCSFGGV  | 581-595 |
| 118       | DITPCSFGGVSVITP  | 586-600 |
| 119       | SFGGVSVITPGTNTS  | 591-605 |
| 120       | SVITPGTNTSNQVAV  | 596-610 |
| 121       | GTNTSNQVAVLYQDV  | 601-615 |
| 122       | NQVAVLYQDVNCTEV  | 606-620 |
| 123       | LYQDVNCTEVPVAIH  | 611-625 |
| 124       | NCTEVPVAIHADQLT  | 616-630 |
| 125       | PVAIHADQLTPTWRV  | 621-635 |
| 126       | ADQLTPTWRVYSTGS  | 626-640 |
| 127       | PTWRVYSTGSNVFQT  | 631-645 |
| 128       | YSTGSNVFQTRAGCL  | 636-650 |
| 129       | NVFQTRAGCLIGAEH  | 641-655 |
| 130       | RAGCLIGAEHVNNSY  | 646-660 |
| 131       | IGAEHVNNSYECDIP  | 651-665 |
| 132       | VNNSYECDIPIGAGI  | 656-670 |
| 133       | ECDIPIGAGICASYQ  | 661-675 |
| 134       | IGAGICASYQTQTNS  | 666-680 |
| 135       | CASYQTQTNSPRRAR  | 671-685 |
| 136       | TQTNSPRRARSVASQ  | 676-690 |
| 137       | PRRARSVASQSIIAY  | 681-695 |

| Peptide # | Peptide Sequence | aa      |
|-----------|------------------|---------|
| 138       | SVASQSIAYTMSLG   | 686-700 |
| 139       | SIIAYTMSLGAENSV  | 691-705 |
| 140       | TMSLGAENSVAYSNN  | 696-710 |
| 141       | AENSVAYSNNNSIAIP | 701-715 |
| 142       | AYSNNSIAIPTNFTI  | 706-720 |
| 143       | SIAIPTNFTISVTTE  | 711-725 |
| 144       | TNFTISVTTEILPVS  | 716-730 |
| 145       | SVTTEILPVSMTKTS  | 721-735 |
| 146       | ILPVSMTKTSVDCTM  | 726-740 |
| 147       | MTKTSVDCTMYICGD  | 731-745 |
| 148       | VDCTMYICGDSTECS  | 736-750 |
| 149       | YICGDSTECSNLLLQ  | 741-755 |
| 150       | STECSNLLLQYGSFC  | 746-760 |
| 151       | NLLLQYGSFCTQLNR  | 751-765 |
| 152       | YGSFCTQLNRALTGI  | 756-770 |
| 153       | TQLNRALTGIAVEQD  | 761-775 |
| 154       | ALTGIAVEQDKNTQE  | 766-780 |
| 155       | AVEQDKNTQEVFAQV  | 771-785 |
| 156       | KNTQEVFAQVKQIYK  | 776-790 |
| 157       | VFAQVKQIYKTPPIK  | 781-795 |
| 158       | KQIYKTPPIKDFGGF  | 786-800 |
| 159       | TPPIKDFGGFNFSQI  | 791-805 |
| 160       | DFGGFNFSQILPDPS  | 796-810 |
| 161       | NFSQILPDPSKPSKR  | 801-815 |
| 162       | LPDPSKPSKRSFIED  | 806-820 |
| 163       | KPSKRSFIEDLLFNK  | 811-825 |
| 164       | SFIEDLLFNKVTLAD  | 816-830 |
| 165       | LLFNKVTLADAGFIK  | 821-835 |
| 166       | VTLADAGFIKQYGDC  | 826-840 |
| 167       | AGFIKQYGDCLGDIA  | 831-845 |
| 168       | QYGDCLGDIAARDLI  | 836-850 |
| 169       | LGDIAARDLICAQKF  | 841-855 |
| 170       | ARDLICAQKFENGLTV | 846-860 |
| 171       | CAQKFENGLTVLPPLL | 851-865 |

| <b>Peptide #</b> | <b>Peptide Sequence</b> | <b>aa</b> |
|------------------|-------------------------|-----------|
| 172              | NGLTVLPPLLTDEMI         | 856-870   |
| 173              | LPPLLTDEMIAQYTS         | 861-875   |
| 174              | TDEMIAQYTSALLAG         | 866-880   |
| 175              | AQYTSALLAGTITSG         | 871-885   |
| 176              | ALLAGTITSGWTFGA         | 876-890   |
| 177              | TITSGWTFGAGAALQ         | 881-895   |
| 178              | WTFGAGAALQIPFAM         | 886-900   |
| 179              | GAALQIPFAMQMAYR         | 891-905   |
| 180              | IPFAMQMAYRFNGIG         | 896-910   |
| 181              | QMAYRFNGIGVTQNV         | 901-915   |
| 182              | FNGIGVTQNVLYENQ         | 906-920   |
| 183              | VTQNVLYENQKLIAN         | 911-925   |
| 184              | LYENQKLIANQFNSA         | 916-930   |
| 185              | KLIANQFNSAIGKIQ         | 921-935   |
| 186              | QFNSAIGKIQDSLSS         | 926-940   |
| 187              | IGKIQDSLSSSTASAL        | 931-945   |
| 188              | DSLSSSTASALGKLQD        | 936-950   |
| 189              | TASALGKLQDVVNQN         | 941-955   |
| 190              | GKLQDVVNQNAQALN         | 946-960   |
| 191              | VVNQNAQALNTLVKQ         | 951-965   |
| 192              | AQALNTLVKQLSSNF         | 956-970   |
| 193              | TLVKQLSSNFGAISS         | 961-975   |
| 194              | LSSNFGAISSVLNDI         | 966-980   |
| 195              | GAISSVLNDILSRLD         | 971-985   |
| 196              | VLNDILSRLDKVEAE         | 976-990   |
| 197              | LSRLDKVEAEVQIDR         | 981-995   |
| 198              | KVEAEVQIDRLITGR         | 986-1000  |
| 199              | VQIDRLITGRLQSLQ         | 991-1005  |
| 200              | LITGRLQSLQTYVTQ         | 996-1010  |
| 201              | LQSLQTYVTQQLIRA         | 1001-1015 |
| 202              | TYVTQQLIRAAEIRA         | 1006-1020 |
| 203              | QLIRAAEIRASANLA         | 1011-1025 |
| 204              | AEIRASANLAATKMS         | 1016-1030 |
| 205              | SANLAATKMSECVLG         | 1021-1035 |

| Peptide # | Peptide Sequence | aa        |
|-----------|------------------|-----------|
| 206       | ATKMSECVLGQSKRV  | 1026-1040 |
| 207       | ECVLGQSKRVDFCGK  | 1031-1045 |
| 208       | QSKRVDFCGKGYHLM  | 1036-1050 |
| 209       | DFCGKGYHLMSFPQS  | 1041-1055 |
| 210       | GYHLMSFPQSAPHGV  | 1046-1060 |
| 211       | SFPQSAPHGVVFLHV  | 1051-1065 |
| 212       | APHGVVFLHVTVPA   | 1056-1070 |
| 213       | VFLHVTVVPAQEKNF  | 1061-1075 |
| 214       | TVVPAQEKNFTTAPA  | 1066-1080 |
| 215       | QEKNFTTAPAICHDG  | 1071-1085 |
| 216       | TTAPAICHDGKAHFP  | 1076-1090 |
| 217       | ICHDGKAHFPREGVF  | 1081-1095 |
| 218       | KAHFPREGVFSNGT   | 1086-1100 |
| 219       | REGVFSNGTHWFVT   | 1091-1105 |
| 220       | VSNNGTHWFVTQRNFY | 1096-1110 |
| 221       | HWFVTQRNFYEPQII  | 1101-1115 |
| 222       | QRNFYEPQIITDNT   | 1106-1120 |
| 223       | EPQIITDNTFVSGN   | 1111-1125 |
| 224       | TTDNTFVSGNCDVVI  | 1116-1130 |
| 225       | FVSGNCDWIGIVNN   | 1121-1135 |
| 226       | CDWIGIVNNTVYDP   | 1126-1140 |
| 227       | GIVNNTVYDPLQPEL  | 1131-1145 |
| 228       | TVYDPLQPELDSFKE  | 1136-1150 |
| 229       | LQPELDSFKEELDKY  | 1141-1155 |
| 230       | DSFKEELDKYFKNHT  | 1146-1160 |
| 231       | ELDKYFKNHTSPDVD  | 1151-1165 |
| 232       | FKNHTSPDVDLGDIS  | 1156-1170 |
| 233       | SPDVDLGDISGINAS  | 1161-1175 |
| 234       | LGDISGINASVNIQ   | 1166-1180 |
| 235       | GINASVNIQKEIDR   | 1171-1185 |
| 236       | VVNIQKEIDRLNEVA  | 1176-1190 |
| 237       | KEIDRLNEVAKNLNE  | 1181-1195 |
| 238       | LNEVAKNLNESLIDL  | 1186-1200 |
| 239       | KNLNESLIDLQELGK  | 1191-1205 |

| <b>Peptide #</b> | <b>Peptide Sequence</b> | <b>aa</b> |
|------------------|-------------------------|-----------|
| <b>240</b>       | SLIDLQELGKYEQYI         | 1196-1210 |
| <b>241</b>       | QELGKYEQYIKWPWY         | 1201-1215 |
| <b>242</b>       | YEQYIKWPWYIWLGF         | 1206-1220 |
| <b>243</b>       | KWPWYIWLGFIAGLI         | 1211-1225 |
| <b>244</b>       | IWLGFIAGLIAIVMV         | 1216-1230 |
| <b>245</b>       | IAGLIAIVMVTIMLC         | 1221-1235 |
| <b>246</b>       | AIVMVTIMLCCMTSC         | 1226-1240 |
| <b>247</b>       | TIMLCCMTSCCCLK          | 1231-1245 |
| <b>248</b>       | CMTSCCCLKGCCSC          | 1236-1250 |
| <b>249</b>       | CSCLKGCCSCGSCCK         | 1241-1255 |
| <b>250</b>       | GCCSCGSCCKFDEDD         | 1246-1260 |
| <b>251</b>       | GSCCKFDEDDSEPV          | 1251-1265 |
| <b>252</b>       | FDEDDSEPVKGVKL          | 1256-1270 |
| <b>253</b>       | SEPVKGVKLHYT            | 1261-1273 |

Table S3. SARS-CoV-2 Spike Hotspot-Ancestral and Hotspot-Omicron peptide libraries used to study responses to the Omicron variant (BA.1)

| Peptide # | Spike Hotspot-Ancestral | Spike Hotspot-Omicron | aa      |
|-----------|-------------------------|-----------------------|---------|
| 1         | LPFFSNVTWFHAIHV         | LPFFSNVTWFHVISG       | 56-70   |
| 2         | NVTWFHAIHVSGTNG         | NVTWFHVISGTNGTK       | 61-75   |
| 3         | HAIHVSGTNGTKRFD         | HVISGTNGTKRFDNP       | 66-80   |
| 4         | FNDGVYFASTEKSNI         | FNDGVYFASIEKSNI       | 86-100  |
| 5         | YFASTEKSNIIRGWI         | YFASIEKSNIIRGWI       | 91-105  |
| 6         | CEFQFCNDPFLGVYY         | CEFQFCNDPFLDHKN       | 131-145 |
| 7         | CNDPFLGVYYHKNNK         | CNDPFLDHKNNKSWM       | 136-150 |
| 8         | LGVYYHKNNKSWMES         | LDHKNNKSWMESEFR       | 141-155 |
| 9         | FKIYSKHTPINLVRD         | FKIYSKHTPIIVEPE       | 201-215 |
| 10        | KHTPINLVRDLPQGF         | KHTPIIVEPERDLPQ       | 206-220 |
| 11        | NLVRDLPQGFSALEP         | IVEPERDLPQGFSAL       | 211-225 |
| 12        | IVRFPNITNLCPFGE         | IVRFPNITNLCPFDE       | 326-340 |
| 13        | NITNLCPFGEVFNAT         | NITNLCPFDEVFNAT       | 331-345 |
| 14        | CPFGEVFNATRFASV         | CPFDEVFNATRFASV       | 336-350 |
| 15        | CVADYSVLYNSASF          | CVADYSVLYNLAPFF       | 361-375 |
| 16        | SVLYNSASFSTFKCY         | SVLYNLAPFFTFKCY       | 366-380 |
| 17        | SASFSTFKCYGVSPT         | LAPFFTFKCYGVSPT       | 371-385 |
| 18        | EVRQIAPGQTGKIAD         | EVRQIAPGQTGNIAD       | 406-420 |
| 19        | APGQTGKIADYNYKL         | APGQTGNIADYNYKL       | 411-425 |
| 20        | GKIADYNYKLPPDFT         | GNIADYNYKLPPDFT       | 416-430 |
| 21        | PDDFTGCVIAWNSNN         | PDDFTGCVIAWNSNK       | 426-440 |
| 22        | GCVIAWNSNNLDSKV         | GCVIAWNSNKLDSKV       | 431-445 |
| 23        | WNSNNLDSKVGNYN          | WNSNKLDSKVGNYN        | 436-450 |
| 24        | LDSKVGNYNYLYRL          | LDSKVGNYNYLYRL        | 441-455 |
| 25        | GGNYNYLYRLFRKSN         | SGNYNYLYRLFRKSN       | 446-460 |
| 26        | RDISTEIQAGSTPC          | RDISTEIQAGNKPC        | 466-480 |
| 27        | EIQAGSTPCNGVEG          | EIQAGNKPCNGVAG        | 471-485 |
| 28        | GSTPCNGVEGFNCYF         | GNKPCNGVAGFNCYF       | 476-490 |
| 29        | NGVEGFNCYFPLQSY         | NGVAGFNCYFPLRSY       | 481-495 |
| 30        | FNCYFPLQSYGFQPT         | FNCYFPLRSYSFRPT       | 486-500 |
| 31        | PLQSYGFQPTNGVGY         | PLRSYSFRPTYGVGH       | 491-505 |
| 32        | GFQPTNGVGYQPYRV         | SFRPTYGVGHQPYRV       | 496-510 |
| 33        | NGVGYQPYRVVLSF          | YGVGHQPYRVVLSF        | 501-515 |
| 34        | NKCVNFNFNGLTGTG         | NKCVNFNFNGLKGTG       | 536-550 |
| 35        | FNFNGLTGTGVLTES         | FNFNGLKGTGVLTES       | 541-555 |
| 36        | LTGTGVLTESNKKFL         | LKGTGVLTESNKKFL       | 546-560 |



| Peptide # | Spike Hotspot-Ancestral | Spike Hotspot-Omicron | aa      |
|-----------|-------------------------|-----------------------|---------|
| 37        | GTNTSNQVAVLYQDV         | GTNTSNQVAVLYQGV       | 601-615 |
| 38        | NQVAVLYQDVNCTEV         | NQVAVLYQGVNCTEV       | 606-620 |
| 39        | LYQDVNCTEVPVAIH         | LYQGVNCTEVPVAIH       | 611-625 |
| 40        | NVFQTRAGCLIGAEH         | NVFQTRAGCLIGAEY       | 641-655 |
| 41        | RAGCLIGAEHVNNSY         | RAGCLIGAEYVNNSY       | 646-660 |
| 42        | IGAEHVNNSYECDIP         | IGAEYVNNSYECDIP       | 651-665 |
| 43        | IGAGICASYQTQTNS         | IGAGICASYQTQTKS       | 666-680 |
| 44        | CASYQTQTNSPRRAR         | CASYQTQTKSHRRAR       | 671-685 |
| 45        | TQTNSPRRARSVASQ         | TQTKSHRRARSVASQ       | 676-690 |
| 46        | PRRARSVASQSIAY          | HRRARSVASQSIAY        | 681-695 |
| 47        | SIIAYTMSLGAENSV         | SIIAYTMSLGVENSV       | 691-705 |
| 48        | TMSLGAENSVAYSNN         | TMSLGVENSVAYSNN       | 696-710 |
| 49        | AENSVAYSNNNSIAIP        | VENSVAYSNNNSIAIP      | 701-715 |
| 50        | NLLLQYGSFCTQLNR         | NLLLQYGSFCTQLKR       | 751-765 |
| 51        | YGSFCTQLNRALTGI         | YGSFCTQLKRALTGI       | 756-770 |
| 52        | TQLNRALTGIAVEQD         | TQLKRALTGIAVEQD       | 761-775 |
| 53        | KQIYKTPPIKDFGGF         | KQIYKTPPIKYFGGF       | 786-800 |
| 54        | TPPIKDFGGFNFSQI         | TPPIKYFGGFNFSQI       | 791-805 |
| 55        | DFGGFNFSQILPDPS         | YFGGFNFSQILPDPS       | 796-810 |
| 56        | ARDLICAQKFNGLTV         | ARDLICAQKFKGLTV       | 846-860 |
| 57        | CAQKFNGLTVLPPLL         | CAQKFKGLTVLPPLL       | 851-865 |
| 58        | NGLTVLPPLLTDEMI         | KGLTVLPPLLTDEMI       | 856-870 |
| 59        | TASALGKLQDVVNQN         | TASALGKLQDVVNHN       | 941-955 |
| 60        | GKLQDVVNQNAQALN         | GKLQDVVNHNNAQALN      | 946-960 |
| 61        | VVNQNAQALNTLVKQ         | VVNHNNAQALNTLVKQ      | 951-965 |
| 62        | AQALNTLVKQLSSNF         | AQALNTLVKQLSSKF       | 956-970 |
| 63        | TLVKQLSSNFGAISS         | TLVKQLSSKFGAISS       | 961-975 |
| 64        | LSSNFGAISSVLNDI         | LSSKFGAISSVLNDI       | 966-980 |
| 65        | GAISSVLNDILSRLD         | GAISSVLNDIFSRLD       | 971-985 |
| 66        | VLNDILSRLDKVEAE         | VLNDIFSRLDKVEAE       | 976-990 |
| 67        | LSRLDKVEAEVQIDR         | FSRLDKVEAEVQIDR       | 981-995 |

Table S4. List of labelling reagents used for flow cytometry

| Target                                                           | Organism   | Color        | Clone     | Label          | RRID/Cat. no | Dilution (in 100µL) |
|------------------------------------------------------------------|------------|--------------|-----------|----------------|--------------|---------------------|
| CD3                                                              | anti-Human | BV650        | SP34-2    | BD Horizon™    | AB_2738486   | 2.5                 |
| CD4                                                              | anti-Human | AF700        | RPA-T4    | Biolegend      | AB_493743    | 2.5                 |
| CD8                                                              | anti-Human | V500         | RPA-T8    | BD Horizon™    | AB_1937333   | 0.5                 |
| CD69                                                             | anti-Human | PE/Dazzle594 | FN50      | Biolegend      | AB_2564276   | 2                   |
| CD134/OX40                                                       | anti-Human | PerCP-Cy5.5  | Ber-ACT35 | Biolegend      | AB_10720986  | 2                   |
| CD137/4-1BB                                                      | anti-Human | PE-Cy5       | 4B4-1     | BD Horizon™    | AB_394067    | 5                   |
| IL-10                                                            | anti-Human | BV421        | JES3-9D7  | Biolegend      | AB_10896947  | 6                   |
| IFN-gamma                                                        | anti-Human | PE-Cy7       | 4S.B3     | eBioscience™   | AB_1659719   | 6                   |
| IL-2                                                             | anti-Human | PerCP-Cy5.5  | MQ1-17H12 | BD Pharmingen™ | AB_1727543   | 5                   |
| LIVE/DEAD™ Fixable Yellow Dead Cell Stain Kit (405nm excitation) |            |              |           | ThermoFisher   | Cat. L34959  | 0.1                 |
